1      **Diet unmask genetic variants that regulate lifespan in outbred Drosophila**

2      **Authors:** Luisa F. Pallares<sup>1,2†</sup>, Amanda J. Lea<sup>1,2†</sup>, Clair Han<sup>3</sup>, Elena V. Filippova<sup>1</sup>, Peter  
3                          Andolfatto<sup>4‡</sup>, Julien F. Ayroles<sup>1,2‡\*</sup>

4

5      **Affiliations:**

6      <sup>1</sup>Lewis-Sigler Institute for Integrative Genomics, Princeton University, Princeton NJ, USA.

7      <sup>2</sup>Ecology and Evolutionary Biology Department, Princeton University, Princeton NJ, USA.

8      <sup>3</sup>Janelia Research Campus of the Howard Hughes Medical Institute, Ashburn VA, USA

9      <sup>4</sup>Department of Biological Sciences, Columbia University, New York, NY, USA.

10     †These authors contributed equally.

11     ‡These authors contributed equally.

12

13     \*Correspondence to: [jayroles@princeton.edu](mailto:jayroles@princeton.edu).

14

15

16 **Abstract:**

17 Several evolutionary forces are thought to maintain genetic variation for fitness-related traits, such  
18 as lifespan, but experimental support is limited. Using a powerful experimental design, we  
19 identified lifespan-associated variants by exposing outbred *Drosophila melanogaster* to standard  
20 and high-sugar diets and tracking genome-wide allele frequency changes as the flies aged. We  
21 mapped alleles associated with early vs late life tradeoffs, late-onset effects, and genotype-by-  
22 environment (GxE) interactions – all of which are predicted by long-standing theories to maintain  
23 genetic variation for lifespan. We also validated an environmentally-dependent role for *nAChRα4*  
24 in regulating lifespan; the ortholog of this gene is one of the few lifespan-associated genes in  
25 humans (CHRNA3). Our results provide insight into the highly polygenic and context-dependent  
26 genetic architecture of lifespan, as well as the evolutionary processes that shape this key trait.

27

28 **Main text:**

29 Lifespan, a major component of fitness and a key life history trait, has a genetic basis: it is  
30 modestly heritable in humans and other organisms ( $h^2 \sim 10\%$ ) (1) and dozens of lifespan-reducing  
31 alleles have now been identified (2, 3). However, the fact that genetic variation for lifespan exists  
32 at all presents an evolutionary puzzle, as it is expected that natural selection will purge fitness-  
33 reducing alleles from the gene pool. Evolutionary theory provides several potential, non-mutually  
34 exclusive explanations for this conundrum. Lifespan-reducing alleles may persist because: (i) they  
35 are only deleterious in late-life, when selection is relatively weak (the mutation accumulation  
36 theory (4)), (ii) they provide benefits early in life that outweigh their late-life costs (the antagonistic  
37 pleiotropy theory (5)), and (iii) their effects vary across environments (genotype-by-environment,  
38 GxE) making them difficult to purge through purifying selection.

39

40 Notably, a special class of GxE interactions, driven by evolutionarily recent changes in human  
41 diet and lifestyle (6–8), are thought to be particularly important for human disease. Specifically, it  
42 has been proposed that complex diseases are caused by alleles that evolved under stabilizing or  
43 positive selection throughout human history, but are now “mismatched” to obesogenic diets and  
44 other aspects of modern life (6–9). While this explanation is compelling, empirical data is limited  
45 due to the difficulty of identifying GxE interactions at genome-wide scale with high power (but see  
46 (10)). As a result, the degree to which exposure to evolutionarily novel environments alters the  
47 relationship between genetic variation and fitness-related traits remains unclear.

48  
49 To address this question, we leveraged the tractable experimental and genomic tools of  
50 *Drosophila melanogaster* to map loci that affect lifespan in two environments. Specifically, we  
51 exposed an outbred population of flies to two diets: a standard laboratory diet and a high sugar  
52 diet containing more sucrose than flies would encounter in nature and that is known to cause  
53 obesity, diabetes, and reduced lifespan in this species (11, 12). Drawing inspiration from a recent  
54 study of human longevity (13), we tracked genome-wide allele frequency changes in age-matched  
55 flies across their entire adult life. Using this high-powered experimental approach (Figure 1A-B),  
56 we were able to identify thousands of lifespan-reducing alleles that decrease in frequency as  
57 individuals grow older, as well as to classify them into: (i) GxE alleles that have stronger effects  
58 on lifespan on one diet, potentially due to risk alleles being exposed by the novel high sugar diet,  
59 (ii) alleles with tradeoffs between early and late life that first increase and then decrease  
60 (antagonistic pleiotropy theory), and (iii) late-onset alleles that only decrease at late ages  
61 (mutation accumulation theory). Together, our study provides insight into the genetic architecture  
62 and environmental sensitivity of a major life history trait, and experimentally addresses long-  
63 standing theories for why fitness-reducing alleles abound in nature.

64

65

## 66 **Sex and genotype have environment-specific effects on lifespan**

67 To identify loci associated with lifespan variation and evaluate their context-dependence, we  
68 exposed large, replicate populations of age-matched outbred flies to standard laboratory (from  
69 now on “control” or “CTRL”) and high sugar (“HS”) diets for one generation (n=3 replicates of  
70 ~10,000 flies per diet; Figure 1A). To prevent overlapping generations, the food containers where  
71 flies also lay eggs were exchanged every three days. We drew a random sample of ~2000 flies  
72 at the beginning of the experiment ( $T_0$ ), and continued to sample ~500 flies from each population  
73 at regular intervals. When only the ~500 longest-lived flies were left in a given replicate cage, we  
74 collected a final sample ( $T_N$ ) (Table S1,2). In total, 10,637 flies were genotyped using individually  
75 barcoded low-coverage genome sequencing (Fig. S1) to estimate age-specific genome-wide  
76 allele frequencies on each diet.

77

78 While all replicates for the two diets started from a common pool of standing genetic variation at  
79 the beginning of the experiment (Figure 1C; Table S3), we observed a consistent ~1.6 fold  
80 reduction in lifespan for flies on the HS diet, as expected (12). We also observed substantial and  
81 unexpected interactions between diet and sex: while the sex ratio remained roughly 1:1 as flies  
82 aged on the HS diet, males far outlived females on the CTRL diet resulting in a sex ratio of ~100:1  
83 by the end of the experiment (Figure 1D; Table S4). We replicated this observation in independent  
84 experiments where time-to-death of individual flies was quantified, suggesting that it is a  
85 repeatable characteristic of the fly population used here (Cox proportional hazards: p(sex-by-diet)  
86 = 0.026) (Fig. S2, Table S5). While others have also observed that sex-specific lifespans in flies  
87 are sometimes environmentally-dependent (14, 15), future work is necessary to uncover the  
88 proximate mechanisms at play here.

89

90 We estimated allele frequencies at 291,319 common SNPs (MAF>0.05) and tested for alleles that  
91 exhibited a significantly lower frequency at the end of the experiment ( $T_N$ ; n=1443 and 1866

92 sequenced flies for CTRL and HS, respectively) compared to the beginning of the experiment ( $T_0$ ;  
93  $n=2104$  sequenced flies). Such decreases in frequency indicate that individuals carrying a focal  
94 allele die at younger ages relative to individuals carrying the alternative allele (Figure 1B). We  
95 identified 4294 genetic variants that fit this pattern distributed among 2425 genes (FDR<1%, beta-  
96 binomial model; Figure 2, Table S6, Fig. S3). The average absolute decrease in allele frequency  
97 (between  $T_N$  and  $T_0$ ) for these lifespan-associated SNPs was 0.08, with most changes falling  
98 between 0.05-0.11 (Fig. S4). The majority of these lifespan-associated variants (2812; 66%) had  
99 similar or “shared” effect sizes between environments (defined as FDR<1% in one environment  
100 and  $p<0.05$  in the other). However, many lifespan-associated SNPs (1482; 34%) exhibited  
101 evidence for GxE interactions, and had stronger effects on lifespan on one diet relative to the  
102 other (“GxE” defined as FDR<1% in one environment and  $p>0.05$  in the other environment, which  
103 our simulations suggest picks up a conservative set of SNPs with environmentally-dependent  
104 effect sizes; Fig. S5). Strikingly, out of the 1482 SNPs with GxE effects on lifespan, 91% had  
105 larger effects on the HS diet, indicating that their effects are magnified under dietary stress (Figure  
106 2). These results suggest that a substantial amount of genetic variation that appears to have little  
107 effect on phenotypic variation under one set of conditions might indeed play a fundamental role  
108 in new or stressful environments.

109

110 Given the striking sex-by-diet interaction on overall mortality patterns (Figure 1D), we also  
111 evaluated the degree to which the genetic basis of lifespan differs between the sexes using two  
112 approaches. First, we tested for allele frequency differences between males and females at  $T_0$ .  
113 We do not expect any sex differences at  $T_0$  unless there are loci with sex-specific effects on  
114 viability during development (e.g., loci that have genetic incompatibilities with the Y chromosome  
115 or that interact with X chromosome dosage (16). We found 663 SNPs with viability effects (beta-  
116 binomial model, FDR<1%; Figure 3A, Table S7). Two notable examples fall near *nAChRa4*, the  
117 ortholog of *CHRNA3* which has sex-specific effects on longevity in humans (3, 13). Second, we

118 tested for alleles with time ( $T_N$  vs  $T_0$ ) by sex interactions which would point to SNPs with sex-  
119 specific effects on lifespan. For this analysis we used data from the HS replicates only; the  
120 absence of females at  $T_N$  in the CTRL replicates prevented their use for this purpose (Figure 1D).  
121 Only 29 SNPs showed significant sex-dependent effects on lifespan (beta-binomial model,  
122 FDR<1%; Table S8). Because we found only modest evidence that sex modifies the genetic  
123 architecture of lifespan in adult flies, we combined both sexes for most subsequent analyses.

124

### 125 **Biological and functional insight into the genetic basis of lifespan**

126 To understand the biology of loci that contribute to lifespan similarly on both diets (n=2812  
127 “shared” SNPs) or more so on one diet (n=136 and 1346 SNPs with stronger effects on the CTRL  
128 and HS diets, respectively) we first asked whether shared or GxE lifespan-associated SNPs were  
129 enriched in particular genomic features. We found that both SNP groups are enriched in protein-  
130 coding regions (Fisher’s exact test: odds ratio=1.15 and 1.12,  $p=2.7 \times 10^{-4}$  and  $p=0.039$ , for shared  
131 and GxE SNPs, respectively; Table S9). Nevertheless, using RNA-seq data generated from an  
132 independent replicate of the main experimental set up (n=162, Figure 4A Table S10, Fig. S6), we  
133 found that lifespan-associated SNPs were 1.4x more likely to fall near genes differentially  
134 expressed between old ( $T_N$ ) and young ( $T_0$ ) flies (relative to SNPs not associated with lifespan;  
135 Fisher’s exact test,  $p=4.4 \times 10^{-11}$ ). This suggests that while lifespan-altering genetic variation is  
136 slightly biased toward protein-coding regions, it likely also plays an important regulatory role for  
137 genes relevant to aging.

138

139 Second, we asked whether genes harboring shared or GxE lifespan-associated SNPs were  
140 enriched for any particular molecular processes. We found that while both gene sets were strongly  
141 enriched for genes identified in previous studies of *D. melanogaster* longevity (Figure 4B, Table  
142 S12), they were not significantly enriched for any particular molecular pathway nor for “canonical”  
143 longevity genes (FDR<1%; Table S12). Restricting our analyses to genes that both contain

144 longevity alleles and are differentially expressed with age did uncover some enrichment,  
145 particularly for oogenesis and neuronal related processes (FDR<1%; Table S13). However, these  
146 results more generally support a highly polygenic model in which genetic variation segregating in  
147 wild-derived populations of *D. melanogaster* does not localize to the canonical biological  
148 pathways associated with aging and lifespan (17, 18), as was also observed by (14).

149  
150 Many of the lifespan-associated genes we identified perform essential functions. For example,  
151 *midway*, involved in fat metabolism and oogenesis (19), and *lovit*, involved in neurophysiology  
152 (20), both contain lifespan-associated SNPs. Using loss-of-function mutant lines, we validated  
153 their effects on lifespan (*lovit*: *p*-value = 0.042; *midway*: *p*-value < 10<sup>-16</sup>), and show that *midway*  
154 acts in an environment-dependent manner (*p*-value = 7x10<sup>-4</sup>, Figure 4C-D, Table S14). We also  
155 used loss-of-function mutant lines to investigate *nAChRα4* – the ortholog of a key human longevity  
156 gene, *CHRNA3* – for which our main experiment revealed complex sex-by-diet-by-genotype  
157 interactions (Fig 3C-D). Our follow up experiments confirmed this three-way interaction: wild type  
158 males maintained a large survival advantage over *nAChRα4* mutants on both diets, while in  
159 females this effect was modest on a CTRL diet and completely reversed on a HS diet (Fig. 3C-D,  
160 Table S14). These results are in agreement with human studies where variants near *CHRNA3*  
161 have stronger effects on lifespan in males (3, 13); however, they also suggest that dampened  
162 *CHRNA3*-lifespan associations in human females may be driven by environmental interactions  
163 that obscure main effects of genotype.

164

### 165 **Testing evolutionary theories of aging and longevity**

166 Fitness-reducing alleles are thought to largely be governed by mutation-selection balance, in  
167 which mutation continuously generates deleterious alleles and purifying selection eliminates them  
168 (21). In support of this idea (22), we find that the minor allele reduces lifespan 98% of the time.  
169 That said, these risk alleles are by no means rare in the population (mean frequency +/- SD at T<sub>0</sub>

170 = 0.363 +/- 0.121; Table S6), suggesting that other evolutionary forces maintain them at moderate  
171 frequencies. Our results establish GxE interactions as one such key factor. We next asked if two  
172 additional forces, antagonistic pleiotropy and mutation accumulation, may also be important  
173 contributors to this feature of the data. Specifically, we estimated allele frequencies at several  
174 time points between  $T_0$  and  $T_N$  to determine the trajectory of lifespan-reducing alleles (Figure 1A,  
175 Table S1,2). We then asked whether these alleles exhibited (i) a U-shaped pattern indicative of  
176 trade-offs and differential fitness effects at young versus old ages, as predicted by antagonistic  
177 pleiotropy theory (5); (ii) evidence for fitness-effects only at old ages, as predicted by mutation  
178 accumulation theory (4); or (iii) an evolutionary “null” model of constant fitness-effects at all ages  
179 (Figure 5A).

180  
181 Of the 4294 SNPs with shared or GxE effects on lifespan, we confidently assigned 61 to one of  
182 the three trajectories described above ( $\Delta$ AIC between the best and second-best trajectory > 99%  
183 of permutations). 49% of these 61 SNPs followed an antagonistic pleiotropy pattern, and 46% a  
184 pattern consistent with mutation accumulation theory. Importantly, only 3 SNPs exhibited constant  
185 changes in frequency with age, a pattern that does not correspond to any of the evolutionary  
186 models we have considered (Figure 5, Table S15). In further support of antagonistic pleiotropy  
187 theory, we also find that genes near any shared or GxE lifespan-associated SNPs (not just the 61  
188 with assigned trajectories) significantly overlap with a previous study of age-specific fertility in flies  
189 (Figure 4B; Table S12; (23)). This overlap further indicates that many longevity-reducing alleles  
190 are maintained because they provide other benefits, for example to fertility in early adulthood, that  
191 outweigh their late life costs.

192

### 193 **The evolution of alleles with GxE effects on lifespan**

194 We have shown evidence that lifespan-reducing alleles are maintained at intermediate  
195 frequencies in outbred flies through several evolutionary forces, namely GxE interactions,



196 mutation accumulation, and antagonistic pleiotropy. Strikingly, we find that exposing flies to  
197 unusually high sugar concentrations reveals many previously hidden/cryptic fitness-associated  
198 variants, as has been predicted repeatedly (6) but rarely tested experimentally. This result has  
199 implications for human health, as it is thought that rapid shifts in human diet and lifestyle following  
200 the Industrial Revolution have caused previously adaptive or neutral alleles to become  
201 “mismatched” or “maladaptive”, such that they are currently associated with diseases that impact  
202 lifespan (Figure 5E; (6, 7, 10)).

203

204 Both the standard lab (CTRL) and the HS diets represent substantial dietary changes for our  
205 experimental flies, compared to conditions “in the wild”. Thus, it is likely that alleles under selection  
206 to maximize longevity in wild conditions are not optimally matched to either of the diets in our  
207 experiment. This is especially likely of the HS diet for which we observed a substantially shortened  
208 lifespan. If the variants contributing to lifespan differences on the two diets in our experiment were  
209 previously neutral, we would expect no bias with regard to whether variants causing lifespan  
210 differences are associated with the ancestral or derived allele. Contrary to this expectation, we  
211 find that, for both shared and GxE SNPs, lifespan-reducing alleles are more likely to be derived.  
212 This pattern is most dramatic for HS-specific risk alleles: 67% of lifespan-reducing alleles are  
213 derived compared to background expectations of 52% (estimated using 1000 randomly drawn  
214 pools of non-significant SNPs) (Figure 5F). Thus, it is clear that lifespan-reducing alleles are  
215 unlikely to be neutral, and their high frequencies in the source population also make it unlikely  
216 that they reflect mutation-selection balance. We speculate that directional selection in response  
217 to spatial and temporal environmental heterogeneity has resulted in high frequency-derived  
218 alleles that contribute to reduced longevity in new environments (24).

219

220

221 **Implications for understanding the genetic basis of lifespan variation**

222 Long-standing population genetic and evolutionary theories have proposed several forces at play  
223 in the maintenance of genetic variation for fitness-related traits (4–6, 8). However, the predictions  
224 of these theories have rarely been experimentally tested, due to the difficulty of mapping fitness-  
225 related genetic effects. For example, a recent human study using a similar approach to ours but  
226 a 10-fold larger sample size found only two lifespan-associated loci near the *APOE* and *CHRNA3*  
227 genes (13). Instead, we identified thousands of lifespan-associated loci, many of which have  
228 larger effects on the HS diet, uncovering a highly polygenic and context-dependent architecture.  
229 We estimate that in the absence of environmental heterogeneity, both studies have similar  
230 statistical power (Fig. S7); the fact that we find orders of magnitude more lifespan-associated  
231 SNPS here highlights the utility of well-controlled experimental designs in model organisms for  
232 the study of complex traits. Because our high-powered design allowed us to identify many  
233 lifespan-reducing alleles, we could evaluate the generality of long-standing theories for why  
234 alleles that shorten lifespan persist in nature and how they evolve. Specifically, we identified GxE  
235 interactions, as well as mutation accumulation and antagonistic pleiotropy, as factors maintaining  
236 genetic variation for lifespan. We also provide experimental insight into how interactions between  
237 derived genetic variation and novel environmental conditions may shorten lifespan.

238

239 **References and Notes:**

- 240 1. J. G. Ruby, K. M. Wright, K. A. Rand, A. Kermany, K. Noto, D. Curtis, N. Varner, D.  
241 Garrigan, D. Slinkov, I. Dorfman, J. M. Granka, J. Byrnes, N. Myres, C. Ball, Estimates of  
242 the Heritability of Human Longevity Are Substantially Inflated due to Assortative Mating.  
243 *Genetics*. **210**, 1109–1124 (2018).
- 244 2. M. Kuningas, S. P. Mooijaart, D. V. Heemst, B. J. Zwaan, P. E. Slagboom, R. G. J.  
245 Westendorp, Genes encoding longevity: from model organisms to humans. *Aging Cell*. **7**,  
246 270–280 (2008).
- 247 3. P. K. Joshi, K. Fischer, K. E. Schraut, H. Campbell, T. Esko, J. F. Wilson, Variants near  
248 CHRNA3/5 and APOE have age- and sex-related effects on human lifespan. *Nature*  
249 *Communications*. **7**, 11174 (2016).
- 250 4. P. B. Medawar, *An unsolved problem of biology* (Published for the College by H.K. Lewis,  
251 London, 1952).
- 252 5. G. C. Williams, Pleiotropy, Natural Selection, and the Evolution of Senescence. *Evolution*.  
253 **11**, 398–411 (1957).
- 254 6. G. Gibson, Decanalization and the origin of complex disease. *Nature Reviews Genetics*. **10**,  
255 134–140 (2009).
- 256 7. S. Corbett, A. Courtiol, V. Lummaa, J. Moorad, S. Stearns, The transition to modernity and  
257 chronic disease: mismatch and natural selection. *Nature Reviews Genetics*. **19**, 419–430  
258 (2018).
- 259 8. G. Gibson, I. Dworkin, Uncovering cryptic genetic variation. *Nature Reviews Genetics*. **5**,  
260 681–690 (2004).
- 261 9. A. D. Rienzo, R. R. Hudson, An evolutionary framework for common diseases: the  
262 ancestral-susceptibility model. *Trends in Genetics*. **21**, 596–601 (2005).
- 263 10. L. Quintana-Murci, Understanding rare and common diseases in the context of human  
264 evolution. *Genome Biology*. **17**, 225 (2016).
- 265 11. L. P. Musselman, J. L. Fink, K. Narzinski, P. V. Ramachandran, S. S. Hathiramani, R. L.  
266 Cagan, T. J. Baranski, A high-sugar diet produces obesity and insulin resistance in wild-  
267 type *Drosophila*. *Disease Models & Mechanisms*. **4**, 842–849 (2011).
- 268 12. J. Na, L. P. Musselman, J. Pendse, T. J. Baranski, R. Bodmer, K. Ocorr, R. Cagan, A  
269 *Drosophila* Model of High Sugar Diet-Induced Cardiomyopathy. *PLOS Genetics*. **9**,  
270 e1003175 (2013).
- 271 13. H. Mostafavi, T. Berisa, F. R. Day, J. R. B. Perry, M. Przeworski, J. K. Pickrell, Identifying  
272 genetic variants that affect viability in large cohorts. *PLOS Biology*. **15**, e2002458 (2017).

- 273 14. W. Huang, T. Campbell, M. A. Carbone, W. E. Jones, D. Unselt, R. R. H. Anholt, T. F. C.  
274 Mackay, Context-dependent genetic architecture of *Drosophila* life span. *PLoS Biol.* **18**,  
275 e3000645 (2020).
- 276 15. J. M. S. Burger, D. E. L. Promislow, Sex-Specific Effects of Interventions That Extend Fly  
277 Life Span. *Sci. Aging Knowl. Environ.* **2004**, pe30 (2004).
- 278 16. D. A. Barbash, Genetic Testing of the Hypothesis That Hybrid Male Lethality Results From  
279 a Failure in Dosage Compensation. *Genetics.* **184**, 313–316 (2010).
- 280 17. M. D. W. Piper, L. Partridge, *Drosophila* as a model for ageing. *Biochimica et Biophysica*  
281 *Acta (BBA) - Molecular Basis of Disease.* **1864**, 2707–2717 (2018).
- 282 18. C. López-Otín, M. A. Blasco, L. Partridge, M. Serrano, G. Kroemer, The Hallmarks of  
283 Aging. *Cell.* **153**, 1194–1217 (2013).
- 284 19. M. Buszczak, X. Lu, W. A. Segraves, T. Y. Chang, L. Cooley, Mutations in the midway  
285 gene disrupt a *Drosophila* acyl coenzyme A: diacylglycerol acyltransferase. *Genetics.* **160**,  
286 1511–1518 (2002).
- 287 20. Y. Xu, T. Wang, LOVIT Is a Putative Vesicular Histamine Transporter Required in  
288 *Drosophila* for Vision. *Cell Reports.* **27**, 1327-1333.e3 (2019).
- 289 21. J. F. Crow, M. Kimura, *An Introduction to Population Genetics Theory* (Blackburn Press,  
290 2009).
- 291 22. T. Kido, W. Sikora-Wohlfeld, M. Kawashima, S. Kikuchi, N. Kamatani, A. Patwardhan, R.  
292 Chen, M. Sirota, K. Kodama, D. Hadley, A. J. Butte, Are minor alleles more likely to be  
293 risk alleles? *BMC Medical Genomics.* **11**, 3 (2018).
- 294 23. M. F. Durham, M. M. Magwire, E. A. Stone, J. Leips, Genome-wide analysis in *Drosophila*  
295 reveals age-specific effects of SNPs on fitness traits. *Nature Communications.* **5**, 4338  
296 (2014).
- 297 24. E. Sezgin, D. D. Duvernell, L. M. Matzkin, Y. Duan, C.-T. Zhu, B. C. Verrelli, W. F.  
298 Eanes, Single-Locus Latitudinal Clines and Their Relationship to Temperate Adaptation in  
299 Metabolic Genes and Derived Alleles in *Drosophila melanogaster*. *Genetics.* **168**, 923–931  
300 (2004).
- 301 25. M. U. Carnes, T. Campbell, W. Huang, D. G. Butler, M. A. Carbone, L. H. Duncan, S. V.  
302 Harbajan, E. M. King, K. R. Peterson, A. Weitzel, S. Zhou, T. F. C. Mackay, The Genomic  
303 Basis of Postponed Senescence in *Drosophila melanogaster*. *PLOS ONE.* **10**, e0138569  
304 (2015).
- 305 26. D. K. Fabian, K. Garschall, P. Klepsatel, G. Santos-Matos, É. Sucena, M. Kapun, B.  
306 Lemaitre, C. Schlotterer, R. Arking, T. Flatt, Evolution of longevity improves immunity in  
307 *Drosophila*. *Evolution Letters.* **2**, 567–579 (2018).

- 308 27. K. M. Hoedjes, J. van den Heuvel, M. Kapun, L. Keller, T. Flatt, B. J. Zwaan, Distinct  
309 genomic signals of lifespan and life history evolution in response to postponed reproduction  
310 and larval diet in *Drosophila*. *Evol Lett.* **3**, 598–609 (2019).
- 311 28. S. C. Remolina, P. L. Chang, J. Leips, S. V. Nuzhdin, K. A. Hughes, Genomic basis of  
312 aging and life-history evolution in *Drosophila melanogaster*. *Evolution.* **66**, 3390–3403  
313 (2012).
- 314 29. R. Tacutu, D. Thornton, E. Johnson, A. Budovsky, D. Barardo, T. Craig, E. Diana, G.  
315 Lehmann, D. Toren, J. Wang, V. E. Fraifeld, J. P. de Magalhães, Human Ageing Genomic  
316 Resources: new and updated databases. *Nucleic Acids Res.* **46**, D1083–D1090 (2018).
- 317 30. T. M. Therneau, *coxme: Mixed Effects Cox Models* (2020; [https://CRAN.R-](https://CRAN.R-project.org/package=coxme)  
318 [project.org/package=coxme](https://CRAN.R-project.org/package=coxme)).
- 319 31. T. M. Therneau, P. M. Grambsch, *Modeling Survival Data: Extending the Cox Model*  
320 (Springer-Verlag, New York, 2000; <https://www.springer.com/gp/book/9780387987842>),  
321 *Statistics for Biology and Health*.
- 322 32. T. M. Therneau, T. L. (original S.->R port and R. maintainer until 2009), A. Elizabeth, C.  
323 Cynthia, *survival: Survival Analysis* (2020; <https://CRAN.R-project.org/package=survival>).
- 324 33. S. Picelli, A. K. Björklund, B. Reinius, S. Sagasser, G. Winberg, R. Sandberg, Tn5  
325 transposase and tagmentation procedures for massively scaled sequencing projects. *Genome*  
326 *Res.* **24**, 2033–2040 (2014).
- 327 34. M. Martin, Cutadapt removes adapter sequences from high-throughput sequencing reads.  
328 *EMBnet.journal.* **17**, 10–12 (2011).
- 329 35. H. Li, R. Durbin, Fast and accurate short read alignment with Burrows-Wheeler transform.  
330 *Bioinformatics.* **25**, 1754–1760 (2009).
- 331 36. G. A. Auwera, M. O. Carneiro, C. Hartl, R. Poplin, G. del Angel, A. Levy-Moonshine, T.  
332 Jordan, K. Shakir, D. Roazen, J. Thibault, From FastQ data to high-confidence variant calls:  
333 the genome analysis toolkit best practices pipeline. *Curr. Protoc. Bioinformatics*, 11–10.
- 334 37. S. Purcell, B. Neale, K. Todd-Brown, L. Thomas, M. A. R. Ferreira, D. Bender, J. Maller,  
335 P. Sklar, P. I. W. de Bakker, M. J. Daly, P. C. Sham, PLINK: a tool set for whole-genome  
336 association and population-based linkage analyses. *Am. J. Hum. Genet.* **81**, 559–575 (2007).
- 337 38. L. F. Pallares, S. Picard, J. F. Ayroles, TM3’seq: a tagmentation-mediated 3’sequencing  
338 approach for improving scalability of RNAseq experiments. *G3: Genes, Genomes,*  
339 *Genetics.* **10**, 143–150 (2020).
- 340 39. A. M. Bolger, M. Lohse, B. Usadel, Trimmomatic: a flexible trimmer for Illumina sequence  
341 data. *Bioinformatics.* **30**, 2114–2120 (2014).

- 342 40. A. Dobin, C. A. Davis, F. Schlesinger, J. Drenkow, C. Zaleski, S. Jha, P. Batut, M.  
343 Chaisson, T. R. Gingeras, STAR: ultrafast universal RNA-seq aligner. *Bioinformatics*. **29**,  
344 15–21 (2013).
- 345 41. Y. Liao, G. K. Smyth, W. Shi, featureCounts: an efficient general purpose program for  
346 assigning sequence reads to genomic features. *Bioinformatics*. **30**, 923–930 (2014).
- 347 42. B. S. Weir, C. C. Cockerham, Estimating F-Statistics for the Analysis of Population  
348 Structure. *Evolution*. **38**, 1358–1370 (1984).
- 349 43. R. M. Durbin, D. Altshuler, R. M. Durbin, G. R. Abecasis, D. R. Bentley, A. Chakravarti,  
350 A. G. Clark, F. S. Collins, F. M. De La Vega, P. Donnelly, M. Egholm, P. Flicek, S. B.  
351 Gabriel, R. A. Gibbs, B. M. Knoppers, E. S. Lander, H. Lehrach, E. R. Mardis, G. A.  
352 McVean, D. A. Nickerson, L. Peltonen, A. J. Schafer, S. T. Sherry, J. Wang, R. K. Wilson,  
353 R. A. Gibbs, D. Deiros, M. Metzker, D. Muzny, J. Reid, D. Wheeler, J. Wang, J. Li, M.  
354 Jian, G. Li, R. Li, H. Liang, G. Tian, B. Wang, J. Wang, W. Wang, H. Yang, X. Zhang, H.  
355 Zheng, E. S. Lander, D. Altshuler, L. Ambrogio, T. Bloom, K. Cibulskis, T. J. Fennell, S.  
356 B. Gabriel, D. B. Jaffe, E. Shefler, C. L. Sougnez, D. R. Bentley, N. Gormley, S.  
357 Humphray, Z. Kingsbury, P. Kokko-Gonzales, J. Stone, K. J. McKernan, G. L. Costa, J. K.  
358 Ichikawa, C. C. Lee, R. Sudbrak, H. Lehrach, T. A. Borodina, A. Dahl, A. N. Davydov, P.  
359 Marquardt, F. Mertes, W. Nietfeld, P. Rosenstiel, S. Schreiber, A. V. Soldatov, B.  
360 Timmermann, M. Tolzmann, M. Egholm, J. Affourtit, D. Ashworth, S. Attiya, M.  
361 Bachorski, E. Buglione, A. Burke, A. Caprio, C. Celone, S. Clark, D. Conners, B. Desany,  
362 L. Gu, L. Guccione, K. Kao, A. Kebbel, J. Knowlton, M. Labrecque, L. McDade, C.  
363 Mealmaker, M. Minderman, A. Nawrocki, F. Niazi, K. Pareja, R. Ramenani, D. Riches, W.  
364 Song, C. Turcotte, S. Wang, E. R. Mardis, R. K. Wilson, D. Dooling, L. Fulton, R. Fulton,  
365 G. Weinstock, R. M. Durbin, J. Burton, D. M. Carter, C. Churcher, A. Coffey, A. Cox, A.  
366 Palotie, M. Quail, T. Skelly, J. Stalker, H. P. Swerdlow, D. Turner, A. De Witte, S. Giles,  
367 R. A. Gibbs, D. Wheeler, M. Bainbridge, D. Challis, A. Sabo, F. Yu, J. Yu, J. Wang, X.  
368 Fang, X. Guo, R. Li, Y. Li, R. Luo, S. Tai, H. Wu, H. Zheng, X. Zheng, Y. Zhou, G. Li, J.  
369 Wang, H. Yang, G. T. Marth, E. P. Garrison, W. Huang, A. Indap, D. Kural, W.-P. Lee, W.  
370 Fung Leong, A. R. Quinlan, C. Stewart, M. P. Stromberg, A. N. Ward, J. Wu, C. Lee, R. E.  
371 Mills, X. Shi, M. J. Daly, M. A. DePristo, D. Altshuler, A. D. Ball, E. Banks, T. Bloom, B.  
372 L. Browning, K. Cibulskis, T. J. Fennell, K. V. Garimella, S. R. Grossman, R. E.  
373 Handsaker, M. Hanna, C. Hartl, D. B. Jaffe, A. M. Kernytsky, J. M. Korn, H. Li, J. R.  
374 Maguire, S. A. McCarroll, A. McKenna, J. C. Nemesh, A. A. Philippakis, R. E. Poplin, A.  
375 Price, M. A. Rivas, P. C. Sabeti, S. F. Schaffner, E. Shefler, I. A. Shlyakhter, D. N. Cooper,  
376 E. V. Ball, M. Mort, A. D. Phillips, P. D. Stenson, J. Sebat, V. Makarov, K. Ye, S. C. Yoon,  
377 C. D. Bustamante, L. Clarke, P. Flicek, F. Cunningham, J. Herrero, S. Keenen, E. Kulesha,  
378 R. Leinonen, W. M. McLaren, R. Radhakrishnan, R. E. Smith, V. Zalunin, X. Zheng-  
379 Bradley, J. O. Korbel, A. M. Stütz, S. Humphray, M. Bauer, R. Keira Cheetham, T. Cox,  
380 M. Eberle, T. James, S. Kahn, L. Murray, A. Chakravarti, K. Ye, F. M. De La Vega, Y. Fu,  
381 F. C. L. Hyland, J. M. Manning, S. F. McLaughlin, H. E. Peckham, O. Sakarya, Y. A. Sun,  
382 E. F. Tsung, M. A. Batzer, M. K. Konkel, J. A. Walker, R. Sudbrak, M. W. Albrecht, V. S.  
383 Amstislavskiy, R. Herwig, D. V. Parkhomchuk, S. T. Sherry, R. Agarwala, H. M. Hourii,  
384 A. O. Morgulis, J. E. Paschall, L. D. Phan, K. E. Rotmistrovsky, R. D. Sanders, M. F.  
385 Shumway, C. Xiao, G. A. McVean, A. Auton, Z. Iqbal, G. Lunter, J. L. Marchini, L.

- 386 Moutsianas, S. Myers, A. Tumian, B. Desany, J. Knight, R. Winer, D. W. Craig, S. M.  
387 Beckstrom-Sternberg, A. Christoforides, The 1000 Genomes Project Consortium,  
388 Corresponding author, Steering committee, Production group: Baylor College of Medicine,  
389 BGI-Shenzhen, Broad Institute of MIT and Harvard, Illumina, Life Technologies, Max  
390 Planck Institute for Molecular Genetics, Roche Applied Science, Washington University in  
391 St Louis, Wellcome Trust Sanger Institute, Analysis group: Agilent Technologies, Baylor  
392 College of Medicine, Boston College, Brigham and Women's Hospital, T. H. G. M. D.  
393 Cardiff University, Cold Spring Harbor Laboratory, Cornell and Stanford Universities,  
394 European Bioinformatics Institute, European Molecular Biology Laboratory, Johns Hopkins  
395 University, Leiden University Medical Center, Louisiana State University, US National  
396 Institutes of Health, Oxford University, The Translational Genomics Research Institute, A  
397 map of human genome variation from population-scale sequencing. *Nature*. **467**, 1061–  
398 1073 (2010).
- 399 44. G. Bhatia, N. Patterson, S. Sankararaman, A. L. Price, Estimating and interpreting FST:  
400 The impact of rare variants. *Genome Res.* **23**, 1514–1521 (2013).
- 401 45. J. K. Pickrell, J. C. Marioni, A. A. Pai, J. F. Degner, B. E. Engelhardt, E. Nkadori, J.-B.  
402 Veyrieras, M. Stephens, Y. Gilad, J. K. Pritchard, Understanding mechanisms underlying  
403 human gene expression variation with RNA sequencing. *Nature*. **464**, 768–772 (2010).
- 404 46. A. Lea, J. Tung, X. Zhou, A flexible, efficient binomial mixed model for identifying  
405 differential DNA methylation in bisulfite sequencing data. *PLoS Genet.* **11**, e1005650  
406 (2015).
- 407 47. J. Tung, X. Zhou, S. C. Alberts, M. Stephens, Y. Gilad, The genetic architecture of gene  
408 expression levels in wild baboons. *Elife*. **4**, 1–22 (2015).
- 409 48. C. A. Buerkle, Z. Gompert, Population genomics based on low coverage sequencing: how  
410 low should we go? *Molecular Ecology*. **22**, 3028–3035 (2013).
- 411 49. W. N. Venables, B. D. Ripley, Modern Applied Statistics with S. *Statistics and Computing*  
412 (2002)
- 413 50. M. Lesnoff, R. Lancelot, aod: Analysis of Overdispersed Data. R package version 1.3. 2012  
414 (2016).
- 415 51. R. Kofler, R. V. Pandey, C. Schlötterer, PoPoolation2: identifying differentiation between  
416 populations using sequencing of pooled DNA samples (Pool-Seq). *Bioinformatics*. **27**,  
417 3435–3436 (2011).
- 418 52. G. dos Santos, A. J. Schroeder, J. L. Goodman, V. B. Strelets, M. A. Crosby, J. Thurmond,  
419 D. B. Emmert, W. M. Gelbart, FlyBase Consortium, FlyBase: introduction of the  
420 *Drosophila melanogaster* Release 6 reference genome assembly and large-scale migration  
421 of genome annotations. *Nucleic Acids Res.* **43**, D690-7 (2015).
- 422 53. M. Wang, Y. Zhao, B. Zhang, Efficient Test and Visualization of Multi-Set Intersections.  
423 *Scientific Reports*. **5**, 16923 (2015).

- 424 54. M. I. Love, W. Huber, S. Anders, Moderated estimation of fold change and dispersion for  
425 RNA-seq data with DESeq2. *Genome Biol.* **15**, 550 (2014).
- 426 55. A. Zhu, J. G. Ibrahim, M. I. Love, Heavy-tailed prior distributions for sequence count data:  
427 removing the noise and preserving large differences. *Bioinformatics.* **35**, 2084–2092 (2019).
- 428 56. R. Kofler, C. Schlötterer, Gowinda: unbiased analysis of gene set enrichment for genome-  
429 wide association studies. *Bioinformatics.* **28**, 2084–2085 (2012).
- 430 57. G. F. Berriz, J. E. Beaver, C. Cenik, M. Tasan, F. P. Roth, Next generation software for  
431 functional trend analysis. *Bioinformatics.* **25**, 3043–3044 (2009).
- 432 58. H. Fang, B. Knezevic, K. L. Burnham, J. C. Knight, XGR software for enhanced  
433 interpretation of genomic summary data, illustrated by application to immunological traits.  
434 *Genome Med.* **8**, 129 (2016).
- 435 59. J. Thurmond, J. L. Goodman, V. B. Strelets, H. Attrill, L. S. Gramates, S. J. Marygold, B.  
436 B. Matthews, G. Millburn, G. Antonazzo, V. Trovisco, T. C. Kaufman, B. R. Calvi,  
437 FlyBase Consortium, FlyBase 2.0: the next generation. *Nucleic Acids Res.* **47**, D759–D765  
438 (2019).
- 439 60. A. M. Taverner, L. J. Blaine, P. Andolfatto, Epistasis and physico-chemical constraints  
440 contribute to spatial clustering of amino acid substitutions in protein evolution. *bioRxiv*,  
441 2020.08.05.237594
- 442 61. G. S. C. Slater, E. Birney, Automated generation of heuristics for biological sequence  
443 comparison. *BMC Bioinformatics.* **6**, 31 (2005).
- 444 62. J. B. Lack, J. D. Lange, A. D. Tang, R. B. Corbett-Detig, J. E. Pool, A Thousand Fly  
445 Genomes: An Expanded Drosophila Genome Nexus. *Mol. Biol. Evol.* **33**, 3308–3313  
446 (2016).
- 447 63. A. Löytynoja, N. Goldman, A model of evolution and structure for multiple sequence  
448 alignment. *Philos Trans R Soc Lond B Biol Sci.* **363**, 3913–3919 (2008).
- 449 64. S. F. Altschul, W. Gish, W. Miller, E. W. Myers, D. J. Lipman, Basic local alignment  
450 search tool. *Journal of Molecular Biology.* **215**, 403–410 (1990).
- 451 65. R. C. Edgar, MUSCLE: a multiple sequence alignment method with reduced time and space  
452 complexity. *BMC Bioinformatics.* **5**, 113 (2004).
- 453 66. A. J. Lea, J. Altmann, S. C. Alberts, J. Tung, Developmental Constraints in a Wild Primate.  
454 *Am Nat.* **185**, 809–821 (2015).
- 455 67. A. J. Lea, D. Martins, J. Kamau, M. Gurven, J. F. Ayroles, Urbanization and market-  
456 integration have strong, non-linear effects on cardio-metabolic health in the Turkana.  
457 *bioRxiv*, 756866 (2019).



458

459 **Acknowledgments:**

460 We thank Andrew M. Taverner for providing the multi-species alignments, Erika Gadja for help  
461 collecting flies from the wild, and Michael Fernandez for help maintaining the experimental cages.

462 We also thank members of the Ayroles and Andolfatto labs for their general support and helpful  
463 scientific discussions. **Funding:** LFP was funded by a Long-Term Postdoctoral Fellowship from

464 the Human Frontiers Science Program. AJL was funded by a postdoctoral fellowship from the  
465 Helen Hay Whitney Foundation. JFA is funded by NIH-NIGMS R35GM124881-04 and NIH-NIEHS

466 R01ES029929. **Author contributions:** LFP: conceptualization, formal analysis, investigation,  
467 writing-original draft, writing-review and editing; AJL: conceptualization, formal analysis,

468 investigation, writing-review and editing, visualization; CH: conceptualization, formal analysis,  
469 investigation, writing-review and editing; EVF: investigation; PA: conceptualization, formal

470 analysis, writing-review and editing, funding acquisition; JFA: conceptualization, formal analysis,  
471 writing-review and editing, funding acquisition **Competing interests:** Authors declare no

472 competing interests. **Data and materials availability:** the data and code for analysis will be made  
473 available after publication.

474

475

476 **Supplementary Materials:**

477 Materials and Methods. References cited only in this section (30–67)

478 Figure S1. Mean read coverage for DNA libraries.

479 Figure S2. Sex and diet interact to affect survival.

480 Figure S3. Comparison of the magnitude of the genetic effect on longevity across conditions.

481 Figure S4. Allele frequency changes between T0 and TN.

482 Figure S5. Simulations to understand our definitions of "shared" and "GxE" SNPs.

483 Figure S6. Differential gene expression results between old and young flies.

484 Figure S7. Power to detect a genetic effect on longevity using different study designs.  
485 Figure S8. Sex determined from sequence data.  
486 Figure S9. Power comparison between a Cochran-Mantel-Haenszel (CMH) and beta-binomial  
487 approach.  
488 Table S1. Sampling schedule by time point and cage.  
489 Table S2. Number of flies sequenced and analyzed per time point and cage  
490 Table S3. Fst and Pi calculations  
491 Table S4. Sex bias by time point and cage.  
492 Table S4. Results from a Cox proportional hazards mixed effects model, testing for condition  
493 and sex 5effects on lifespan in vials  
494 Table S6. Sites with significant (FDR<1%) genetic effects on at least one diet  
495 Table S7. Sites with significant (FDR<1%) sex effect at T0.  
496 Table S8. Sites with significant (FDR<1%) sex-by-age effects on a high sugar diet  
497 Table S9. Enrichment of SNPs with significant genetic effects in genomic features  
498 Table S10. Genes differentially expressed as a function of diet and age.  
499 Table S11. Genes related to fecundity and longevity (from this study and others).  
500 Table S12. Enrichment of genes near SNPs with significant genetic effects on longevity in  
501 previously published data sets.  
502 Table S13. GO enrichment for lifespan-associated genes that are also differentially expressed  
503 with age (FDR<5%).  
504 Table S14. Results from a Cox proportional hazards mixed effects model, testing for sex,  
505 condition, and genotype effects on lifespan.  
506 Table S15. Sites for which an allele frequency trajectory could be confidently assigned.  
507 Table S16. List of SNPs for which ancestral state could be confidently assigned  
508  
509  
510  
511

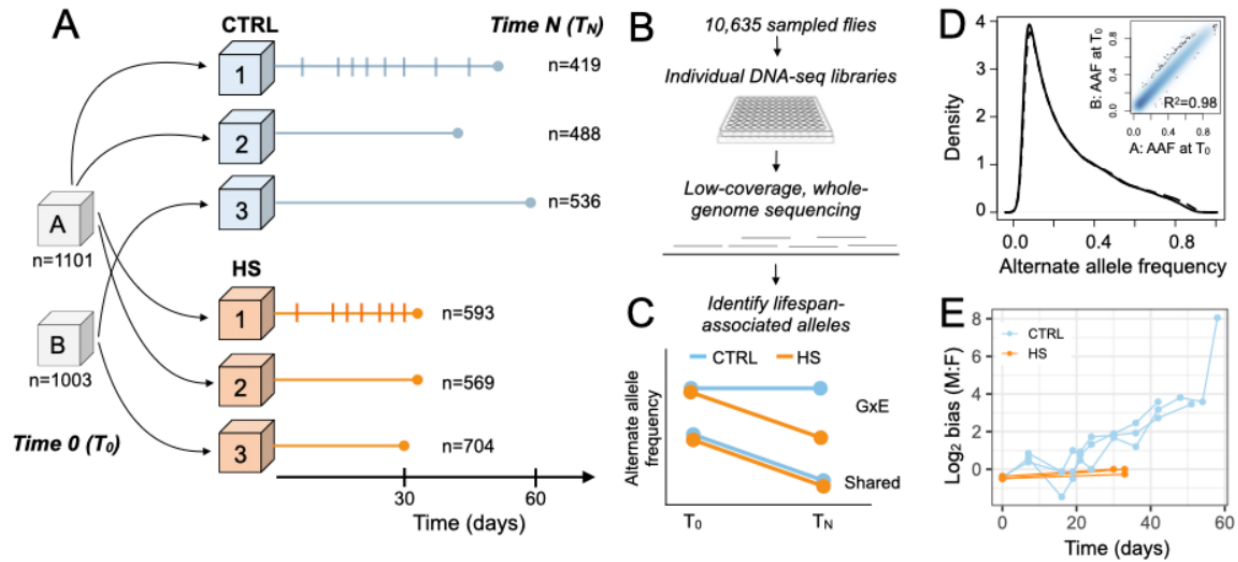

512

513

514 **Fig. 1 Experimental design to detect GxE interactions modulating lifespan.**

515 (A) *D. melanogaster* flies caught in Princeton, NJ were used to generate a synthetic outbred  
 516 population that was kept under laboratory conditions for over a year, and split in two replicate  
 517 cages prior to the beginning of the experiment (A and B). ~1000 flies were collected from A and  
 518 B at the start of the experiment ( $T_0$ ,  $2\pm 1$  days old) and the rest were distributed into 6 replicate  
 519 cages of ~10,000 flies each (3 cages = standard lab diet (CTRL), blue; 3 cages = high sugar diet,  
 520 orange). ~500 flies were sampled every 3-7 days from a given cage and a last sample was taken  
 521 when only ~500 flies were left ( $T_N$ ) (Table S1-2); sampling schedule are noted by vertical dashed  
 522 lines for the CTRL1 and HS1 cages. Identical schedules were followed for all other cages within  
 523 a treatment group. To prevent pupae from the new generation from eclosing inside the  
 524 experimental cages, food containers were replaced every three days. (B) Individually barcoded  
 525 DNA-seq libraries were prepared from 10,635 individual flies sampled from  $T_0$ ,  $T_N$ , and the  
 526 intermediate time points. Each library was sequenced at ~1x depth to estimate allele frequencies  
 527 and test for frequency changes across time (Fig. S1). (C) Expected patterns of frequency change  
 528 are shown for alleles that reduce lifespan in both diets (shared) or more so on the HS diet (GxE).  
 529 (D) The allelic composition of cages A (solid line) and B (dashed line) is very similar at  $T_0$   
 530 ( $n=291,319$  SNPs). Inset shows the per-site correlation between the alternate allele frequency  
 531 (AAF) estimated for cage A versus B at  $T_0$ . (E)  $\text{Log}_2$  ratio of males to females at different timepoints  
 532 during the experiment. The number of flies sexed at each time point is provided in Table S4.

533

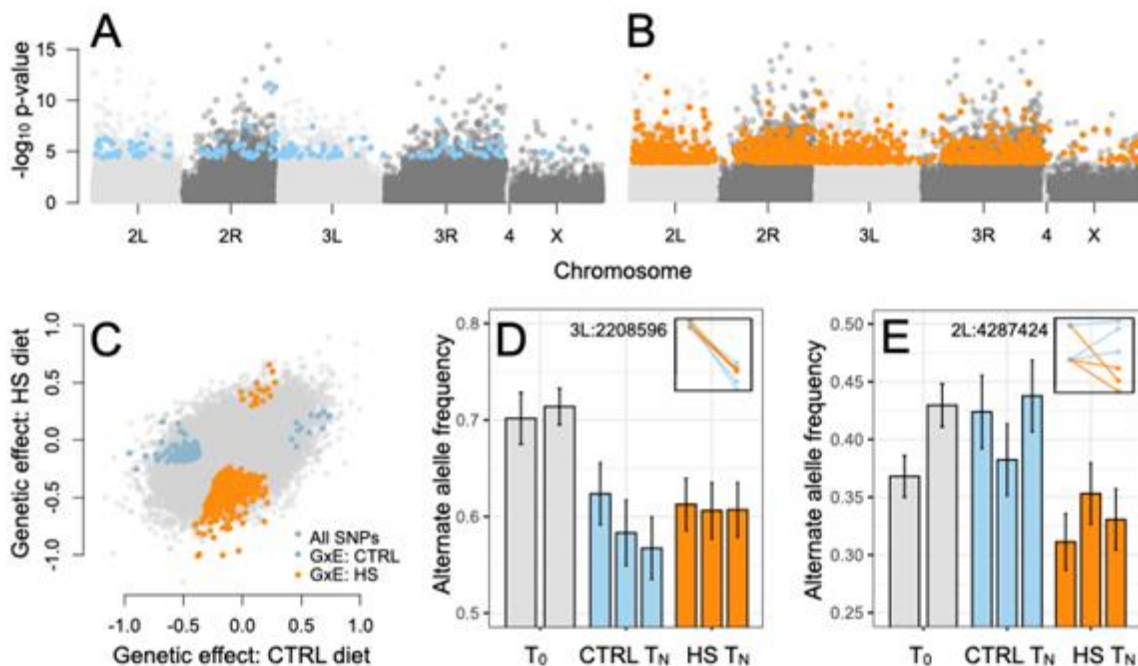

534

535

536 **Fig. 2 GxE interactions determine lifespan.**

537 (A, B) Manhattan plots highlighting significant lifespan-associated SNPs with GxE effects. Plots  
538 show the  $-\log_{10}$  p-value for tests for allele frequency differences between  $T_N$  and  $T_0$  on a (A) CTRL  
539 and (B) HS diet; colored points passed our significance filters for GxE effects (see methods). (C)  
540 Comparison of model-estimated effect sizes for a genetic effect on lifespan on CTRL versus HS  
541 diets (positive values indicate the alternate allele increases in frequency at  $T_N$  versus  $T_0$ ). Only  
542 SNPs with significant evidence for GxE effects are colored. (D, E) Allele frequency changes  
543 across replicates for (D) an example SNP (3L:2208596) associated with lifespan in both dietary  
544 conditions and (E) an example SNP (2L:4287424) with larger effects on lifespan on the HS diet.  
545 The estimated alternate allele frequency is shown for each replicate cage, with bars representing  
546 the standard error. The two  $T_0$  bars correspond to cage A and B. The inset shows the mean  
547 alternate allele frequencies at  $T_N$  and  $T_0$ , for each replicate CTRL (blue) and HS (orange) cage,  
548 using the same x and y axes as in Figure 1B.

549

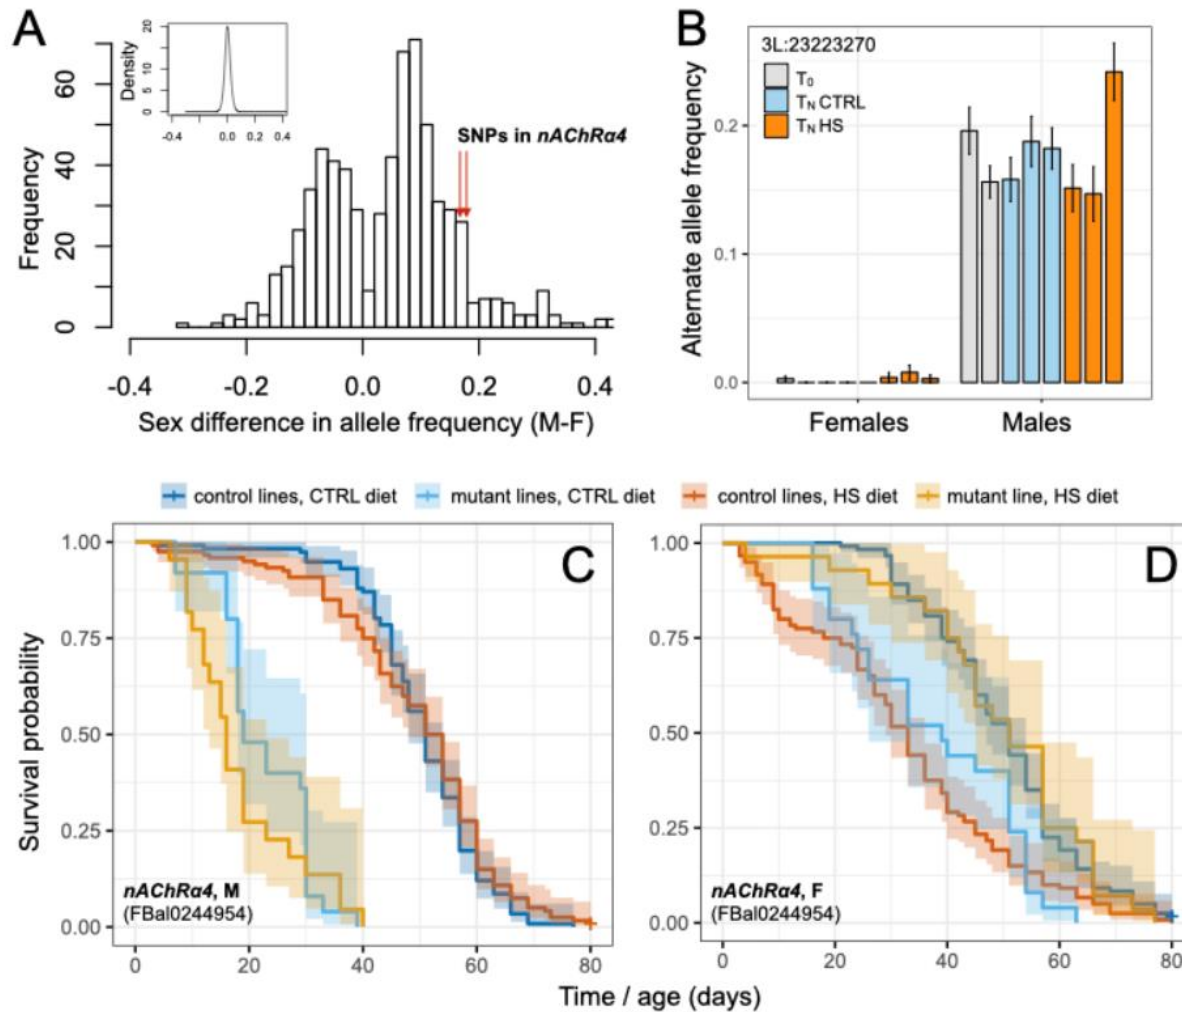

550

551

552 **Fig. 3 Sex differences in viability associated with the *nAChRa4* gene.**

553 **(A)** Histogram of the difference in alternate allele frequency between males and females for SNPs  
554 with significant sex differences at  $T_0$ . Arrows indicate the effect size for SNPs in *nAChRa4*; the  
555 human ortholog -*CHRNA3*- has also been associated with lifespan/viability. Inset shows that the  
556 genome-wide distribution of alternate allele frequency differences between males and females at  
557  $T_0$  is centered at 0. **(B)** Allele frequency changes across replicates and time points for one of the  
558 *nAChRa4* SNPs (3L:23223270). The estimated alternate allele frequency is shown, with bars  
559 representing the standard error. **(C, D)** Survival curves for control lines versus loss-of-function  
560 *nAChRa4* mutants estimated for **(C)** males and **(D)** females, respectively. Kaplan-Meier survival  
561 curves for the control lines include data from four WT lines (DGRP 439, DGRP 181, Canton-S,  
562 and yw) (Table S14).

563

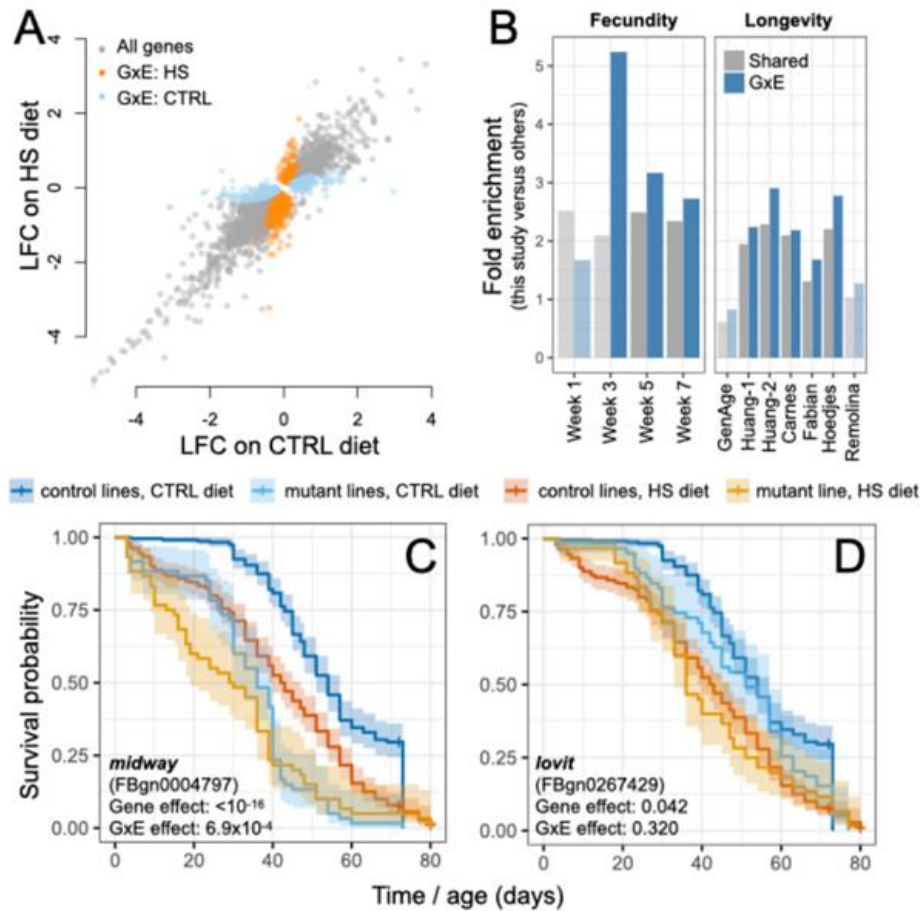

564

565 **Fig. 4 Properties of lifespan-associated genes.**

566 (A) Genes differentially expressed more so on a CTRL (blue) or HS (orange) diet. Axes show the  
 567 estimated log-fold change (LFC) in expression between young and old flies on each diet. Positive  
 568 values indicate higher expression in older flies. (B) Genes in or near (<1kb) SNPs with shared  
 569 (grey) or GxE (blue) effects on lifespan in this experiment overlap with lifespan and fecundity  
 570 genes identified in previous studies (identified by first author's last name). The degree of overlap  
 571 is represented as fold enrichment from a Fisher's exact test, and light bars indicate non-significant  
 572 overlap. Studies represent several types: GWAS for fecundity measured during weeks 1-7 in  
 573 inbred lines (23); selection for extended lifespan in outbred flies (25–28); analyses of standing  
 574 variation associated with lifespan in inbred lines (14); and “canonical” longevity genes from the  
 575 GenAge database (29). Light bars indicate non-significant overlap. (C, D) Kaplan-Meier survival  
 576 curves for two candidate genes, with p-values from a Cox proportional-hazards model testing for  
 577 an effect of the gene on survival as well as a GxE effect. Survival curves for the control lines  
 578 include data from four WT lines (DGRP 439, DGRP 181, Canton-S, and yw).

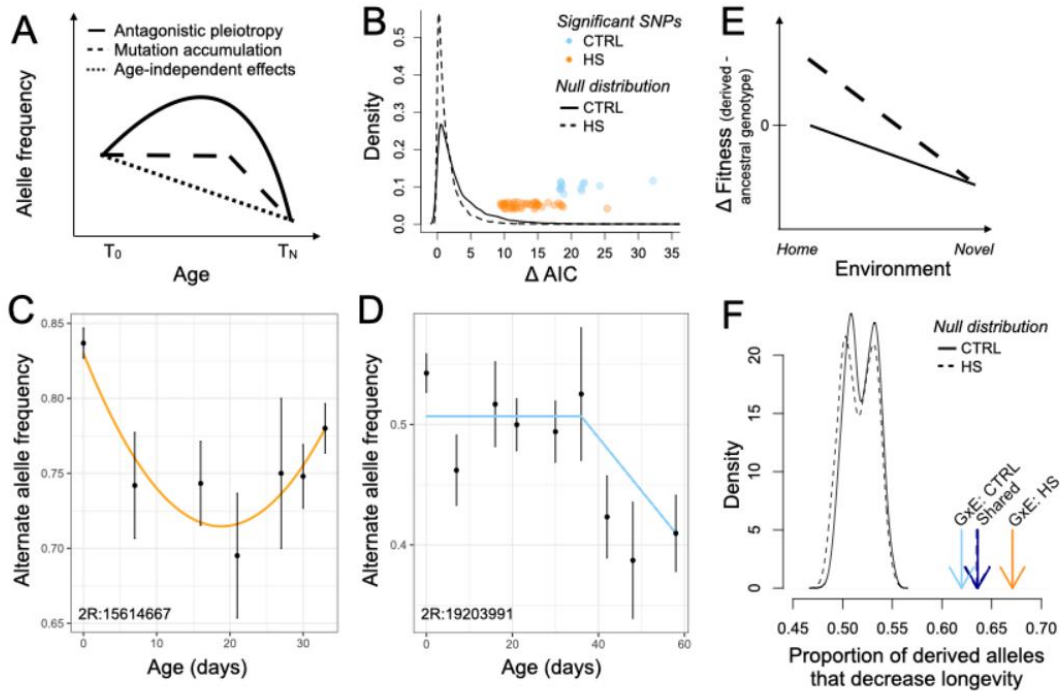

579

580

581 **Fig. 5 Evolutionary insight from longevity-associated SNPs.**

582 **(A)** Allele frequency trajectories across time according to the antagonistic pleiotropy and  
 583 mutation accumulation theories, and a constant trajectory not expected under evolutionary  
 584 models. We asked whether each lifespan-associated SNP could be confidently assigned to one  
 585 of these trajectories. **(B)**  $\Delta$ AIC between the best and second-best model for each tested SNP. HS  
 586 and CTRL cages were analyzed separately due to the different age distributions within each  
 587 treatment (See Figure 1A). SNPs with  $\Delta$ AIC values >99% of the null distribution are confidently  
 588 assigned to a given trajectory and their  $\Delta$ AIC values are plotted as individual points. **(C-D)**  
 589 Examples of a **(C)** quadratic trajectory SNP (2R:15614667) in HS suggesting antagonistic  
 590 pleiotropy and **(D)** a breakpoint trajectory SNP (2R:19203991) in the standard lab environment  
 591 (CTRL) suggesting mutation accumulation dynamics. Points represent the mean alternate allele  
 592 frequency for a given age estimated across all cages, while bars represent the standard error of  
 593 the estimate. **(E)** Potential predictions from mismatch theory: alleles that evolved more recently  
 594 in the focal population (derived alleles) are neutral (black line) or advantageous (dashed line)  
 595 in the “home” environment they evolved in; however, they become deleterious in a “novel”  
 596 environment. **(F)** The derived allele is more likely than the ancestral allele to reduce lifespan  
 597 relative to chance expectations. For lifespan-associated SNPs shared between environments or  
 598 with stronger effects in HS or CTRL, the proportion of SNPs for which the derived allele is the  
 599 lifespan-reducing allele is noted with an arrow. The two arrows for shared SNPs represent the  
 600 proportion estimated using effect sizes from the CTRL (dark blue solid arrow) or HS (dark blue  
 601 dashed arrow) conditions, respectively. Null expectations were derived by performing the same  
 602 calculations on effect sizes from individual CTRL or HS cages across 1000 randomly drawn pools  
 603 of non-significant SNPs.
